# Supplementary material for: Oncolytic Zika virus promotes intratumoral T cell infiltration and improves immunotherapy efficacy in glioblastoma
Source: PubMed Central journal article supplement — Mol Ther Oncolytics. 2022 Feb 1;24:522–34. doi: 10.1016/j.omto.2022.01.011 (PMC8851082; doi:10.1016/j.omto.2022.01.011), 2022-02-01
Supplement: mmc2.pdf [file mmc2.pdf]

**Table S1.** Primer sequences used for qRT-PCR analysis and probe

|                       |                                           |
|-----------------------|-------------------------------------------|
| IFN- $\alpha$ (mouse) | Forward 5'- TGCCCAGCAGATCAAGAAGG -3'      |
|                       | Reverse 5'- TCAGGGGAAATTCCTGCACC -3'      |
| IFN- $\beta$ (mouse)  | Forward 5'- GTACAACAGCTACGCCTGGA -3'      |
|                       | Reverse 5'- GAGTCCGCCTCTGATGCTTA -3'      |
| IFN- $\gamma$ (mouse) | Forward 5'- TCAGGCCATCAGCAACAACA -3'      |
|                       | Reverse 5'- GTGGACCACTCGGATGAGC -3'       |
| IFNAR1 (mouse)        | Forward 5'- CGCGGAGGGCCTAGC -3'           |
|                       | Reverse 5'- GTGGCTGCTCCACTTTAGGG -3'      |
| IFNAR2 (mouse)        | Forward 5'- TGGGTATCCAGATGAACCTTG -3'     |
|                       | Reverse 5'- GCCCTCCAACCACTTATCTG -3'      |
| PD-L1 (mouse)         | Forward 5'- CGCCTGCAGATAGTTCCCAA -3'      |
|                       | Reverse 5'- TAAGGTCCTCCTCTCCTGCC -3'      |
| CXCL9 (mouse)         | Forward 5'- GGAGTTCGAGGAACCCTAGTG -3'     |
|                       | Reverse 5'- GGGATTTGTAGTGGATCGTGC -3'     |
| CXCL10 (mouse)        | Forward 5'- CCAAGTGCTGCCGTCATTTTC -3'     |
|                       | Reverse 5'- GGCTCGCAGGGATGATTTCAA -3'     |
| CXCL11 (mouse)        | Forward 5'- TGTAATTTACCCGAGTAACGGC -3'    |
|                       | Reverse 5'- CACCTTTGTGCTTTATGAGCCTT -3'   |
| CCL5 (mouse)          | Forward 5'- TTTGCCTACCTCTCCCTCG -3'       |
|                       | Reverse 5'- CGACTGCAAGATTGGAGCACT -3'     |
| RSAD2 (mouse)         | Forward 5'- CCGGGAGAGATGGTTCAAGG -3'      |
|                       | Reverse 5'- CTTGACCACGGCCAATCAGA -3'      |
| IFIT1 (mouse)         | Forward 5'- GCAGAGAGTCAAGGCAGGTT -3'      |
|                       | Reverse 5'- TTGTGCATCCCCAATGGGTT -3'      |
| IFIT2 (mouse)         | Forward 5'- AGTTCTGGCCTTCTGCAGTT -3'      |
|                       | Reverse 5'- GCTGTGTCAAAGCGCTCAA -3'       |
| IFIT3 (mouse)         | Forward 5'- TTCCCAGCAGCACAGAAACA -3'      |
|                       | Reverse 5'- AATGGCACTTCAGCTGTGGA -3'      |
| ISG15 (mouse)         | Forward 5'- TGA CTGTGAGAGCAAGCAGC -3'     |
|                       | Reverse 5'- CCCAGCATCTTCACCTTTA -3'       |
| IL-6 (mouse)          | Forward 5'- AGTTGCCTTCTTGGGACTGATG -3'    |
|                       | Reverse 5'- GGGAGTGGTATCCTCTGTGAAGTCT -3' |
| IRF7 (mouse)          | Forward 5'- CTGGAAGACCAACTTCCGCT -3'      |
|                       | Reverse 5'- AGCATTGCTGAGGCTCACTT -3'      |
| PD-L1 (human)         | Forward 5'- GCTATGGTGGTGCCGACTAC -3'      |
|                       | Reverse 5'- CAGATGACTTCGGCCTTGGG -3'      |
| IFNA2 (human)         | Forward 5'- TTCGTATGCCAGCTCACCTT -3'      |
|                       | Reverse 5'- GGATCAGTCAGCATGGTCCT -3'      |
| IFNB1 (human)         | Forward 5'- AGTAGGCGACACTGTTCGTG -3'      |
|                       | Reverse 5'- GCCTCCCATTC AATTGCCAC -3'     |
| CCL5 (human)          | Forward 5'- GGATCAAGACAGCACGTGGA -3'      |

|                |                                          |
|----------------|------------------------------------------|
|                | Reverse 5'- TCGGGTGACAAAGACGACTG -3'     |
| CXCL9 (human)  | Forward 5'- GGTGTTCTTTTCCTCTTGGGC -3'    |
|                | Reverse 5'- AACAGCGACCCTTTCTCACT -3'     |
| CXCL10 (human) | Forward 5'- AGCAGAGGAACCTCCAGTCT -3'     |
|                | Reverse 5'- ATGCAGGTACAGCGTACAGT -3'     |
| CXCL11 (human) | Forward 5'- GAGTGTGAAGGGCATGGCTA -3'     |
|                | Reverse 5'- ATGCAAAGACAGCGTCCTCT -3'     |
| RSAD2 (human)  | Forward 5'- AGTGCAACTACAAATGCGGC -3'     |
|                | Reverse 5'- CTTGCCAGGTATTCTCCCC -3'      |
| IFIT1 (human)  | Forward 5'- GAGGAGCCTGGCTAAGCAAA -3'     |
|                | Reverse 5'- GCTCCAGACTATCCTTGACCTG -3'   |
| IFIT2 (human)  | Forward 5'- CCTGCCGAACAGCTGAGAAT -3'     |
|                | Reverse 5'- AGGCCAGTAGGTTGCACATT -3'     |
| IFIT3 (human)  | Forward 5'- AGACACAGAGGGCAGTCAT -3'      |
|                | Reverse 5'- CTGCCTCGTTGTTACCATCT -3'     |
| IRF7 (human)   | Forward 5'- AGCTGTGCTGGCGAGAAG -3'       |
|                | Reverse 5'- TTGGTTGGGACTGGATCTGC -3'     |
| ZIKV-AS        | Forward 5'- GGTCAGCGTCCTCTCTAATAAACG -3' |
|                | Reverse 5'- GCACCCTAGTGTCCACTTTTTCC -3'  |
| ZIKV-AS Probe  | FAM-AGCCATGACCGACACCACACCGT-BQ1          |
